# 1                    **Computing Skin Cutaneous Melanoma Outcome from the** 2                    **HLA-alleles and Clinical Characteristics**

3   **Anjali Dhall<sup>1</sup>, Sumeet Patiyal<sup>1</sup>, Harpreet Kaur<sup>1,2</sup>, Sherry Bhalla<sup>1</sup>, Chakit Arora<sup>1</sup>, G.P.S.**  
4   **Raghava<sup>1</sup>**

5   <sup>1</sup>Department of Computational Biology, Indraprastha Institute of Information Technology, New  
6   Delhi, India.

7   <sup>2</sup>CSIR-Institute of Microbial Technology, Chandigarh, India.

## 8   **Emails of Authors:**

9   Anjali Dhall: [anjaliid@iiitd.ac.in](mailto:anjaliid@iiitd.ac.in)

10   Sumeet Patiyal: [sumeetp@iiitd.ac.in](mailto:sumeetp@iiitd.ac.in)

11   Harpreet Kaur: [harpreet5aug@imtech.res.in](mailto:harpreet5aug@imtech.res.in); [hks04180@gmail.com](mailto:hks04180@gmail.com)

12   Sherry Bhalla: [s.sherry308@gmail.com](mailto:s.sherry308@gmail.com)

13   Chakit Arora: [chakita@iiitd.ac.in](mailto:chakita@iiitd.ac.in)

14   Gajendra P.S. Raghava: [raghava@iiitd.ac.in](mailto:raghava@iiitd.ac.in)

## 15   **\*CORRESPONDENCE**

16   Professor, Department of Computational Biology

17   Indraprastha Institute of Information Technology,

18   Okhla Industrial Estate, Phase III, New Delhi 110020,

19   India. Tel.: +91 011 26907444

20   E-mail address: [raghava@iiitd.ac.in](mailto:raghava@iiitd.ac.in)

21   **Keywords: Cutaneous melanoma, Survival analysis, HLA, Superalleles, Hazard ratio,**  
22   **Prognosis, Regression, Machine learning**

## 23 **Abstract**

24 Human Leukocyte Antigen (HLA) is an essential component of the immune system which stimulates  
25 immune cells to provide protection and defense against cancer. More than thousands of HLA alleles  
26 have been reported in the literature; but, only a specific set of HLA alleles expressed in an individual.  
27 Recognition of cancer-associated mutations by the immune system depends on the presence of a  
28 particular set of alleles, that elicit an immune response to fight against cancer. It indicates that the  
29 occurrence of specific HLA alleles also affects the outcome of the cancer patients. In the current  
30 study, prediction models have been developed using 415 skin cutaneous melanoma (SKCM) patients  
31 for predicting the overall survival of patients from their HLA-alleles. It has been observed that, the  
32 presence of certain superalleles in the patients, is responsible for improved overall survival which  
33 were referred as favourable superalleles like HLA-B\*55 (HR=0.15, 95% CI 0.034 to 0.67), HLA-  
34 A\*01 (HR=0.5, 95% CI 0.3 to 0.8). In contrast, presence of certain superalleles in the patients is  
35 responsible for their poor survival, those superalleles were referred as unfavourable superalleles such  
36 as HLA-B\*50 (HR=2.76, 95% CI 1.284 to 5.941), HLA-DRB1\*12 (HR=3.44, 95% CI 1.64 to 7.2).  
37 We developed prediction models using 14 HLA-superalleles and five clinical characteristics for  
38 predicting high-risk SKCM patients and achieve HR=4.52 (95% CI 3.088-6.609) with p-value =  
39 8.01E-15. Lastly, we provide a web-based service to community for predicting the risk in SKCM  
40 patients (<https://webs.iiitd.edu.in/raghava/skcmhrp/>)

## 41 1 Introduction

42 HLA complex is highly polymorphic genetic region, located on chromosome 6, precisely 6p21.3  
43 region (1,2). Major histocompatibility complex (MHC) proteins encode more than 200 immune-  
44 related genes, from which, approximately 40 genes were associated with the development of  
45 leukocyte antigens, *i.e.* Class I and Class II HLA genes (3). Out of which, class I genes encode  
46 proteins which present antigens (intracellular peptides) to CD8<sup>+</sup> T lymphocytes, while, class II genes  
47 encode proteins which are present on antigen-presenting cells (APC) that regulate the proliferation  
48 and initiation of CD4<sup>+</sup> T cells(4,5). Furthermore, Class I HLA genes are of three types, *i.e.* A, B and  
49 C, while class II HLA genes are of five types, which include DR, DP, DM, DQ, and DO. Class I  
50 complex generally located on the nucleated cell surface, and Class II genes expressed on the specific  
51 cells such as monocytes, macrophages, and dendritic cells also known as APCs, B lymphocytes and  
52 activated T cells (2).

53 Human Leukocyte Antigen (HLA) molecules play a major/significant role in the induction and  
54 regulation of immune responses. The role of HLA class I molecules has been implied in tumor  
55 resistance to apoptosis (6). Moreover, recent findings suggest that the altered expression of HLA  
56 molecules was associated with metastatic progression and poor prognosis in tumor (7–9). The  
57 modification of surface molecules, lack of co-stimulatory molecules, production of  
58 immunosuppressive cytokines, and alterations in HLA molecules are some primary escape  
59 mechanisms used by tumor cells to evade the immune response(10), which can directly affect the  
60 survival of an individual. Figure 1 represents how the survival of the patients can get affected if  
61 HLAs fails to recognize the tumor cells, which is ultimately responsible for the activation of the  
62 immune system. Previous studies reveal that skin cutaneous melanoma has been reported to be the  
63 most threatening and fatal form of skin cancer and scrutinized multi-omics signatures for the  
64 progression of this malignancy (11–13). It has been shown that if melanoma is detected at an early  
65 stage, the overall survival rate is 95%; but, once it is metastasized (lesion thickness >4mm); they are  
66 tough to cure and the survival rate is reduced to less than 50% (14,15). Melanoma tumor cells escape  
67 the immune checkpoints and proliferate at a higher rate than normal tissue cells (16). Further, it is  
68 categorized as an immunogenic tumor as it's lesions have been found to have signatures of several  
69 immune escape mechanisms such as downregulated expression of HLA molecules, secretion of  
70 cytokines like IL10 and loss of tumor-specific antigens (17).

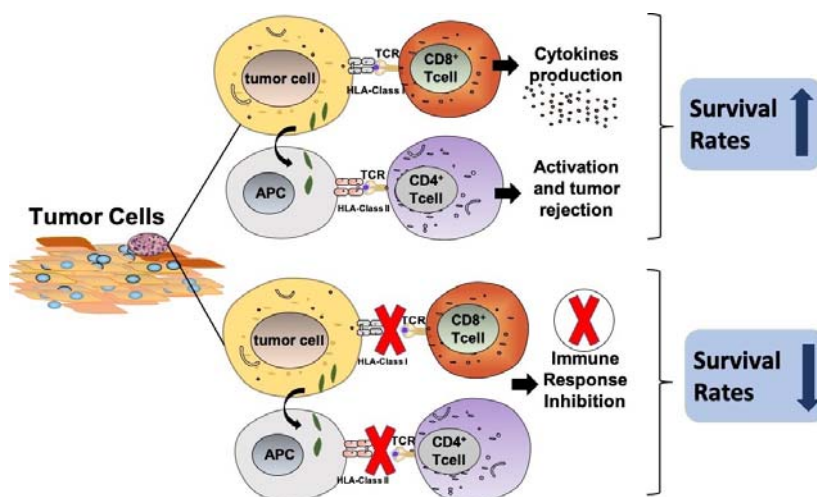

71

72 **Figure 1:** The identification of tumor cells by CD8<sup>+</sup> cytotoxic T cells and CD4<sup>+</sup> T helper cells via  
73 HLA class I and II molecules, respectively.

74 For instance, the downregulation of class I antigens was associated with poor prognosis and  
 75 inadequate treatment in melanoma cases (18–20). Moreover, recent studies demonstrate the  
 76 importance of HLA alleles in the prognosis of melanoma, such as the loss of heterozygosity of HLA  
 77 class I alleles (HLA-B\*15:01) was shown to be related with poor survival outcome. Besides, HLA-C  
 78 alleles and HLA-B44 supertype were shown to enhance the overall survival (21–23), thereby  
 79 claiming that these molecules could be considered as prognostic markers for melanoma. Thus, it is  
 80 vital to analyse the role of class I and II antigens in the survival of melanoma patients. With the  
 81 knowledge of accurate HLA genotyping, one can design immunotherapy-based prognostic  
 82 biomarkers and personalized vaccines against cancer.

83 In the current study, we have made an attempt to understand the role of HLA (Class I and II) alleles  
 84 and superalleles in the survival of the skin cutaneous melanoma (SKCM) patients using TCGA-  
 85 SKCM’s cohort. Here, firstly we have performed HLA-genotyping of patients for the Class I and II  
 86 alleles, followed by their assignment to the superalleles groups. Subsequently, we categorized the  
 87 superalleles into survival favourable and unfavourable superallele groups based on the impact of their  
 88 presence on the survival of the patients. Further, we have developed survival prediction models  
 89 employing key superalleles and clinical features of the patients by using different machine learning  
 90 techniques. Eventually, to serve the scientific community, we have developed a webserver for the  
 91 prediction of low-risk and high-risk patients’ groups based on the HLA-Superalleles and Clinical  
 92 features.

## 93 2 Methods and Materials

### 94 2.1 Study Design and Dataset Collection

95 The workflow of our study is illustrated in Figure 2. The stage description of each step given below.

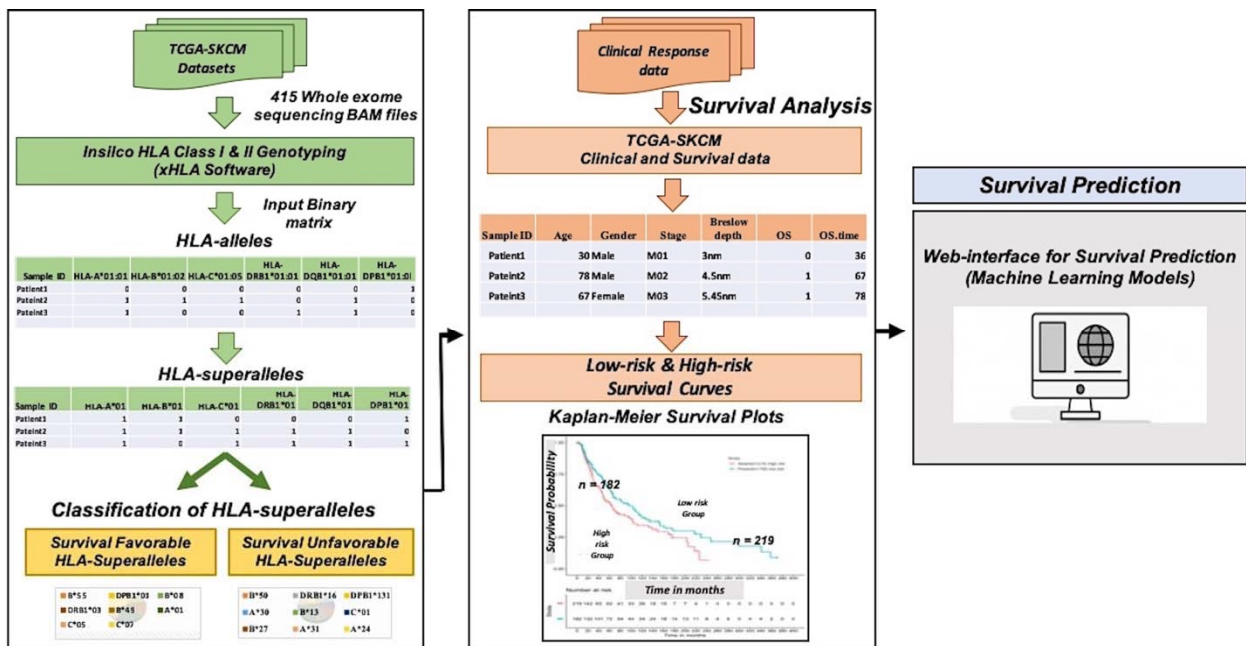

97 **Figure 2:** Work flow present overall architecture of this study

### 98 2.2 Skin cutaneous melanoma patient’s data

99 We have downloaded the SKCM controlled access dataset from GDC data portal. Specifically, the  
 100 whole-exome sequencing (WXS) BAM files of individual melanoma patient were downloaded  
 101 (under the approval of dbGap (Project No. 17674)) according to the Genome Data Commons  
 102 protocols (24) with the help of in-house HPC facility and scripts. Clinical information for 470 SKCM  
 103 patients also obtained, that includes age, gender, stage, tumor status, treatment status, Breslow Depth,  
 104 vital status, Overall Survival (OS) time, etc. using TCGA assembler 2 (25,26). We were able to  
 105 extract the HLA-typing information for 415 patients out of 470 TCGA-SKCM samples only. Out of  
 106 415 samples, fourteen SKCM samples lack overall survival information. In summary, we used 401  
 107 SKCM-patients for which complete survival information is available with exome sequencing data.

### 108 2.3 HLA Typing and Assignment into Superalleles

109 After downloading the whole exome BAM files of SKCM-patients from TCGA, chromosome 6 was  
 110 extracted from these BAM files using SAMtools package (27). In next step, we used xHLA software  
 111 (<https://github.com/humanlongevity/HLA>) for HLA genotyping from chromosome 6. In this study,  
 112 four-digit HLA typing was performed for each patient for the assignment of both Class I (-A, -B, -C)  
 113 and Class II (-DP, -DQ, -DR) HLA genes. Further, an allele is assigned to HLA-superallele on the  
 114 basis of common family alleles (Field F2), i.e. HLA-alleles were grouped to HLA-superalleles on the  
 115 basis of similar HLA-Gene (-A, -B, -C, -DPB1, -DQB1, -DRB1) and Field1 (F1) (which represents  
 116 the allele of a particular gene)(28), the complete representation is given in Figure 3 and  
 117 Supplementary Table S2.

| HLA-alleles |                                                     | HLA-superallele    |
|-------------|-----------------------------------------------------|--------------------|
| HLA-A       | → HLA-A*01:01,HLA-A*01:02,HLA-A*01:03.....          | → HLA-A*01.....    |
| HLA-B       | → HLA-B*44:01,HLA-B*44:02,HLA-A*44:03.....          | → HLA-B*44.....    |
| HLA-C       | → HLA-C*03:01,HLA-C*03:02,HLA-C*03:03.....          | → HLA-C*03.....    |
| HLA-DPB1    | → HLA-DPB1*04:01,HLA-DPB1*04:02,HLA-DPB1*04:03..... | → HLA-DPB1*04..... |
| HLA-DQB1    | → HLA-DQB1*02:33,HLA-DQB1*02:46,HLA-DQB1*02:05..... | → HLA-DQB1*02..... |
| HLA-DRB1    | → HLA-DRB1*01:01,HLA-DRB1*01:02,HLA-DRB1*01:03..... | → HLA-DRB1*01..... |

118

119 **Figure 3:** Representation of HLA-superalleles on the basis of common HLA-gene (-A, -B, -C, -  
 120 DPB1, -DQB1, -DRB1) and Field 1 (F1). F1 and F2 represent the allele group and specific HLA-  
 121 protein respectively.

### 122 2.4 Categorization of HLA-Superalleles

123 Here, we categorized all HLA alleles into favourable and unfavourable groups based on the impact of  
 124 their presence on the survival of patients, i.e. whether the presence of superalleles either improve or

125 decrease the survival. Towards this, firstly, all patients were divided into two groups, i.e. patients  
126 having a particular allele and the patients lacking it; subsequently, the mean survival of patients was  
127 computed in each group. Further, an allele is assigned as survival favourable allele if the mean  
128 survival of the patients having this allele is more than the mean survival of patients lacking this  
129 allele. Similarly, an allele is assigned as an unfavourable allele, if the mean survival of the patients  
130 containing this allele is lower than the mean survival of patients without this allele. It has been  
131 observed that an individual allele is only present in the limited number of patients; thus, grouping  
132 based on the occurrence of allele will be skewed. Therefore, eventually, we analyse the presence and  
133 absence of HLA-superalleles in the patients and assigned them in favourable (SF) and unfavourable  
134 (SU) superalleles groups. Notably, we considered only those superalleles, that must be present in  
135 atleast ten samples before assigning it into any of these groups. Further, to study the overall impact  
136 of the presence of SF and SU superalleles, we combine SF and SU superalleles and prepare a matrix;  
137 where, we assign a score +1 if unfavourable and -1 if favourable superallele is present in an SKCM  
138 patient, otherwise 0. Eventually, all the scores are cumulatively added to generate a single score  
139 called “Risk Score”. Subsequently, threshold-based methods have been developed using these  
140 superalleles as features. Finally, we assign a patient on high-risk if the score is more than threshold of  
141 Risk Score, otherwise low-risk.

## 142 **2.5 Survival Analysis**

143 In the current study, “Univariate” and “Multivariate” survival analysis is performed by using Cox  
144 Proportional Hazard (Cox PH) models implementing ‘survival’ package in R (V.3.5.1). To  
145 understand the impact of each variables like age, tumor stage, tumor status, sex, class I, II HLA-  
146 alleles, HLA-superalleles and Risk Score in the prognosis of SKCM patients, univariate analysis is  
147 performed. Further, to determine the combined effect of multiple factors such as age, tumor stage,  
148 tumor status, sex and class I, II HLA-superalleles, multivariate survival analysis is performed. The  
149 log-rank test was used for the estimation of significant survival distributions between high-risk and  
150 low-risk groups in terms of p-value. To demonstrate the performance of models graphically, high-  
151 risk and low-risk groups are represented by Kaplan-Meier plots (29).

## 152 **2.6 Development of Prediction Models**

### 153 **2.6.1 Models based on machine learning techniques**

154 In the current study, various machine learning techniques have been implemented to develop  
155 regression models for the survival prediction in melanoma patients. These machine learning  
156 techniques include Random Forest (RF) (30), Ridge, Lasso (31), and Decision tree (DT) (32). Most  
157 of these techniques were implemented using python-library scikit-learn (33). To develop prediction  
158 models, we used a wide range of features that include HLA-superalleles, clinical characteristics of  
159 the patients like age, gender, stage, tumor status, Breslow depth, and combination of both.

### 160 **2.6.2 Wrapper based feature selection method**

161 Here, a recursive feature selection model was developed by adding one-by-one HLA-superalleles to  
162 the clinical features based on the performance of each model. Then, survival time was predicted and  
163 followed by computation of Hazard Ratio (HR) for each combination. Briefly, every time input  
164 matrix was updated by adding a new column having HLA-superallele, which had the HR just higher  
165 than that of the previous input matrix. We repeat this process until there is no further improvement in

166 HR. Finally, we are left with the matrix which attained the highest HR. Subsequently, this matrix was  
167 used to build the final prediction model for estimation of OS time.

## 168 **2.7 Evaluation of models**

### 169 **2.7.1 Five-fold cross-validation**

170 In order to avoid the over optimisation in the training of models, we used standard five-fold cross-  
171 validation (34). In brief, all instances are randomly divided into five sets; where, four sets are used  
172 for the training and remaining fifth set for testing. This process is repeated five times so that each set  
173 is used for testing atleast once. The final performance is calculated by averaging the performance on  
174 all five sets.

### 175 **2.7.2 Parameters for measuring performance**

176 The major challenge in these types of studies is to use appropriate parameters for evaluating the  
177 performance of models. In this study, we used standard parameter Hazard Ratio (HR) for measuring  
178 the performance of the models. HR is a measure of the effect of an intervention on an outcome of  
179 interest over time. Our regression models segregate patients into high-risk and low-risk groups by  
180 taking median cut-off. In order to evaluate our model, we compute HR from the predicted group of  
181 patients (high-risk or low-risk patients). Besides, we also measure the confidence interval (CI) with  
182 HR and reported HR at 95% CI. In order to measure the significance of prediction, we also calculate  
183 p-value by using log-rank test. These parameters were implemented previously in various similar  
184 kind of studies (35,36).

## 185 **3 Results**

### 186 **3.1 Distribution of HLA alleles**

187 We have extracted 367 HLA alleles for 415 SKCM-patients from the HLA-genotyping of SKCM  
188 cohort using xHLA software (37). Out of these 367 alleles, 237 belong to HLA-Class I genes (-A,-B,-  
189 C) and 130 alleles correspond to Class II genes (-DP, -DQ, -DR). We compute the frequency  
190 distribution of different alleles in the patients. Due to heterogeneity in HLA-genes, all alleles are not  
191 found in an individual, so the frequency of alleles vary in each patient (38). As shown in Figure 4A,  
192 out of 415 patients only 357 patients have all six alleles, 45 patients have five alleles of HLA Class I  
193 (-A, -B, -C) genes. Most of the patients have all six class I alleles, only few patients (around 13) have  
194 less than three alleles. In case of HLA Class II genes (-DP, -DQ, -DR), only 264 patients have all six  
195 alleles. Most of the alleles present only in a single patient; 134 in case of Class I and 61 in case of  
196 Class II. Only four alleles of Class I are present in more than 100 patients. Similarly, in case of Class  
197 II, only 5 alleles are present in more than 100 patients as shown in Figure 4B and 4C, respectively.  
198 The complete frequency distribution of class I and class II alleles in the SKCM-patients is given  
199 in Supplementary Table S3. Among them, the most abundant (present in  $\geq 20\%$  population) class-I  
200 and class-II HLA alleles include HLA-A\*02:01, HLA-A\*01:01, HLA-C\*07:02, HLA-C\*07:01,  
201 HLA-B\*07:02, HLA-A\*03:01, HLA-DPB1\*04:01, HLA-DQB1\*03:01, HLA-DQB1\*02:01, HLA-  
202 DPB1\*02:01, HLA-DRB1\*07:01, HLA-DRB1\*05:01, HLA-DRB1\*15:01, respectively, as shown in  
203 Figure 4B and 4C.

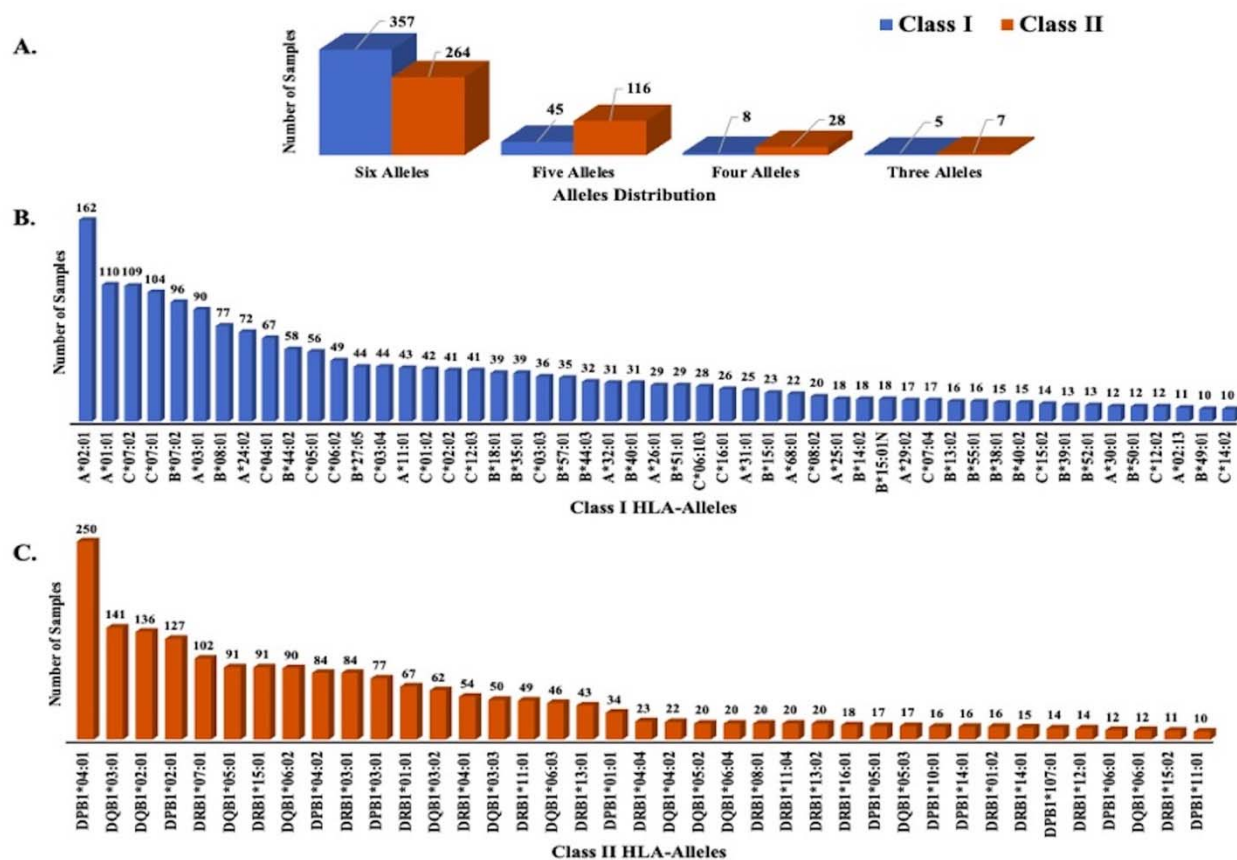

204

205 **Figure 4:** Frequency distribution of HLA-alleles in SKCM-samples, A) Describes the distribution of  
 206 alleles in melanoma samples B) Describes the frequency of Class I HLA-allele with frequency >=10  
 207 C) Represents the frequency of Class II HLA -alleles with frequency >=10 samples

### 208 3.2 Categorization of Superalles into Favourable and Unfavourable Groups

209 In order to understand whether an allele is favourable for survival of the patient or not, we compute  
 210 difference in mean overall survival (MOS) of patients having and lacking a given allele (Table S3).  
 211 Allele is assigned as favourable, if difference in MOS is positive, otherwise unfavourable. For  
 212 instance, Class Allele HLA-A\*01:01 is present in 110 patients with MOS 72.21 months; while, MOS  
 213 is reduced to 55.25 months in 291 patients that lack it. It means this is a favourable allele as its  
 214 presence enhance the MOS. Similarly, Class I allele HLA-A\*24:02 present in 72 patients with MOS  
 215 43.73 and it is absent 329 patients with MOS 63 months. This is an unfavourable allele as its  
 216 presence decreases the MOS of patients. There are several favourable and unfavourable alleles in  
 217 both class of alleles as given in Supplementary Table S3. These alleles can be used to predict risk of  
 218 survival, unfortunately, this statistics is biased as the number of patients having a particular allele is  
 219 very small for most of the alleles. This prompted us to create the superalleles from these alleles.  
 220 Therefore, HLA alleles were further assigned to superalleles on the basis of similarity in the HLA-  
 221 genes and Field1 (F1). Here, 367 alleles were further categorized into 121 Superalles. Out of 121  
 222 Superalles, 60 and 61 belong to class I and II, respectively. HLA-A\*01/02, HLA-B\*07, HLA-  
 223 C\*07, HLA-B\*44, HLA-DPB1\*04/02, HLA-DQB1\*02/03/06/05, HLA-DRB1\*07/15 are the most  
 224 frequent class I and class II HLA superalleles in the SKCM-patients represented in Supplementary  
 225 Figure S1. Distribution of superalleles which are present in at least ten patients is shown in Figure 5.  
 226 The abundance of all remaining superalleles is given in Supplementary Table S4.



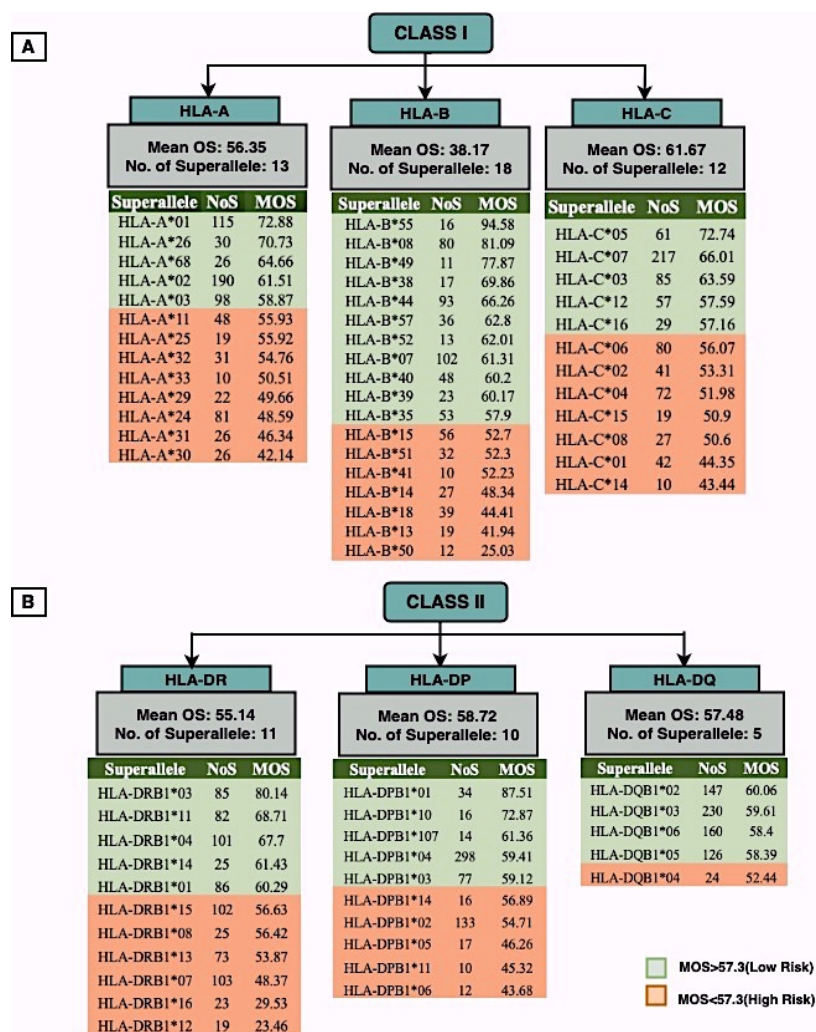

227

228 **Figure 5:** Distribution of HLA-superalleles in present in at least 10 SKCM-patients, A) Class I (B)  
 229 Class II; MOS represents mean overall survival and NOS as number of samples/patients

230 The superalleles having MOS greater than 57.30 and lower than 57.30 are shown in Figure 5 with  
 231 different colors. As shown in Figure 5, MOS of HLA-B superallele is the highest, i.e. 59.50 months  
 232 among all other alleles in SKCM-patients, it means presence of this gene is favourable in OS of  
 233 patients. Further, the HLA-superalleles are categorized into two groups, *i.e.* Survival Favourable (SF)  
 234 and Survival Unfavourable (SU) on the basis of the difference in MOS between patients with a  
 235 specific HLA-superallele-genotyping and patients lacking it. Among the 24 superalleles, 9 were SF  
 236 (HLA-B\*55, HLA-DPB1\*01, HLA-DPB1\*10, HLA-B\*08, HLA-B\*49, HLA-A\*01, HLA-  
 237 DRB1\*03, HLA-C\*05, HLA-C\*07) and 15 were SU (HLA-B\*14, HLA-A\*24, HLA-DPB1\*05,  
 238 HLA-A\*31, HLA-DPB1\*11, HLA-DRB1\*07, HLA-DPB1\*06, HLA-C\*14, HLA-B\*18, HLA-C\*01,  
 239 HLA-B\*13, HLA-A\*30, HLA-DRB1\*16, HLA-B\*50, HLA-DRB1\*12) with their mean overall  
 240 survival and frequency are represented in Table 1.

241 **Table 1. Classification of HLA-superalleles in to SF and SU on the basis of mean OS difference**

| HLA-superalleles | #No. of Samples |        | #Mean OS |        | Mean Diff OS (P-A) | Class (Risk Status) |
|------------------|-----------------|--------|----------|--------|--------------------|---------------------|
|                  | Present         | Absent | Present  | Absent |                    |                     |

|             |     |     |       |       |        |                                    |
|-------------|-----|-----|-------|-------|--------|------------------------------------|
| HLA-B*55    | 16  | 385 | 94.58 | 58.46 | 36.12  | Favorable Super alleles (Low Risk) |
| HLA-DPB1*01 | 34  | 367 | 87.51 | 57.34 | 30.17  |                                    |
| HLA-B*08    | 80  | 321 | 81.09 | 54.62 | 26.47  |                                    |
| HLA-DRB1*03 | 85  | 316 | 80.14 | 54.46 | 25.69  |                                    |
| HLA-B*49    | 11  | 390 | 77.87 | 59.39 | 18.48  |                                    |
| HLA-A*01    | 115 | 286 | 72.88 | 54.68 | 18.20  |                                    |
| HLA-C*05    | 61  | 340 | 72.74 | 57.60 | 15.15  |                                    |
| HLA-DPB1*10 | 16  | 385 | 72.87 | 59.36 | 13.51  |                                    |
| HLA-C*07    | 217 | 184 | 66.01 | 52.70 | 13.31  |                                    |
| HLA-B*14    | 27  | 374 | 48.34 | 60.74 | -12.39 |                                    |
| HLA-A*24    | 81  | 320 | 48.59 | 62.77 | -14.18 |                                    |
| HLA-DPB1*05 | 17  | 384 | 46.26 | 60.51 | -14.25 |                                    |
| HLA-A*31    | 26  | 375 | 46.34 | 60.84 | -14.5  |                                    |
| HLA-DPB1*11 | 10  | 391 | 45.32 | 60.27 | -14.95 |                                    |
| HLA-DRB1*07 | 103 | 298 | 48.37 | 63.89 | -15.51 |                                    |
| HLA-DPB1*06 | 12  | 389 | 43.68 | 60.40 | -16.72 |                                    |
| HLA-C*14    | 10  | 391 | 43.44 | 60.32 | -16.88 |                                    |
| HLA-B*18    | 39  | 362 | 44.41 | 61.57 | -17.16 |                                    |
| HLA-C*01    | 42  | 359 | 44.35 | 61.72 | -17.37 |                                    |
| HLA-B*13    | 19  | 382 | 41.94 | 60.79 | -18.86 |                                    |
| HLA-A*30    | 26  | 375 | 42.14 | 61.13 | -19.00 |                                    |
| HLA-DRB1*16 | 23  | 378 | 29.53 | 61.75 | -32.22 |                                    |
| HLA-B*50    | 12  | 389 | 25.03 | 60.98 | -35.95 |                                    |
| HLA-DRB1*12 | 19  | 382 | 23.46 | 61.71 | -38.26 |                                    |

242 #Samples (P): No of SKCM-patients in which HLA-superallele is present; # Samples (A): No of  
 243 SKCM-patients in which HLA-superallele is absent; #Mean OS (P): Average OS in which HLA-  
 244 superallele is present ; # Mean OS (A): Average OS in which HLA-superallele is absent; Mean Diff  
 245 OS: Mean difference in mean OS between patients with a specific HLA-superallele-genotyping and  
 246 patients without it; Class: Survival Favourable (SF) or Survival Unfavourable (SU) HLA-superallele,  
 247 SF considered as low-risk and SU taken as high-risk groups.

### 248 3.3 Univariate Survival Analysis

#### 249 3.3.1 HLA-Superalleles

250 It is clear from the above analysis that certain allele/superallele are responsible for improving the  
 251 survival of patients. Next challenge is to utilize this information for predicting the high-risk cancer  
 252 patients based on the presence of certain alleles or superalleles. Here, we used only superalleles for  
 253 predicting the high-risk patients employing univariate survival analysis due to poor distribution of  
 254 alleles in patients. We observed that HLA-B\*50 which is responsible for poor survival of patients;  
 255 assigned patients on high risk if this superallele is present and obtained HR 2.77 (95% CI 1.284 to  
 256 5.941) with p-value 0.009. Similarly, HLA-DRB1\*12 achieved maximum performance HR 3.13  
 257 (95% CI 1.687 to 5.826) with p-value<0.001. The combined effect of the presence of HLA-B\*50 and  
 258 HLA-DRB1\*12 is also used to predict high-risk patients and obtained HR 3.15, 95% (CI 1.906 to  
 259 5.194) with p-value less than 0.001, see Supplementary Table S5.

### 260 3.3.2 Risk Score

261 To further improve the performance of the prediction models, we developed a threshold-based  
262 method using multiple superalleles as input features. In this case, we employed multiples variables  
263 that include both favourable and unfavourable superalleles. Towards this, first, we assign -1 and +1  
264 for each favourable and unfavourable superallele, respectively. Thereafter, all the scores are  
265 cumulatively added to generate a single score called “Risk Score” for each patient. Further, to  
266 understand how well Risk Score based on superalleles stratified risk-groups of melanoma patients,  
267 survival analysis was performed using Risk Score as a input feature. For instance, if the threshold  
268 value is  $\geq 2$  then the patients significantly divided into high-risk and low-risk groups with more than  
269 two-folds, i.e. HR 2.18 (95% CI 1.441 to 3.297) with p-value = 0.000223 as given in Table 2.  
270 Conclusively, we found that Risk Score thresholds act as a prognostic indicator for stratifying  
271 melanoma patients into high-risk and low-risk groups, as shown in Table 2. Additionally, Kaplan-  
272 Meier (KM) survival plots represent the segregation of high-risk and low-risk melanoma patients  
273 based on different threshold values of Risk Score, with significant p-values as shown in Figure 6.

274 **Table 2. Survival analysis based on Risk score to discriminate low-risk and high-risk samples.**

| <b>Threshold<br/>(Risk Score)</b> | <b>#G1</b> | <b>#G2</b> | <b>HR</b> | <b>95% CI</b> | <b>P-value</b> |
|-----------------------------------|------------|------------|-----------|---------------|----------------|
| $\geq 3$                          | 375        | 26         | 1.84      | 0.966-3.508   | 0.0635         |
| $\geq 2$                          | 341        | 60         | 2.18      | 1.441-3.297   | 0.000223***    |
| $\geq 1$                          | 275        | 126        | 1.82      | 1.331-2.496   | 0.000183***    |
| $\geq 0$                          | 171        | 230        | 1.71      | 1.277-2.302   | 0.000335***    |
| $\geq -1$                         | 98         | 303        | 1.55      | 1.108-2.156   | 0.0103*        |
| $\geq -2$                         | 61         | 340        | 1.26      | 0.866-1.819   | 0.228          |
| $\geq -3$                         | 37         | 364        | 1.55      | 0.977-2.463   | 0.06           |

275 #G1: No of SKCM-patients representing low-risk group; #G2: No of SKCM-patients denoting high-  
276 risk group; HR: Hazard Ratio; 95% CI: 95% confidence interval

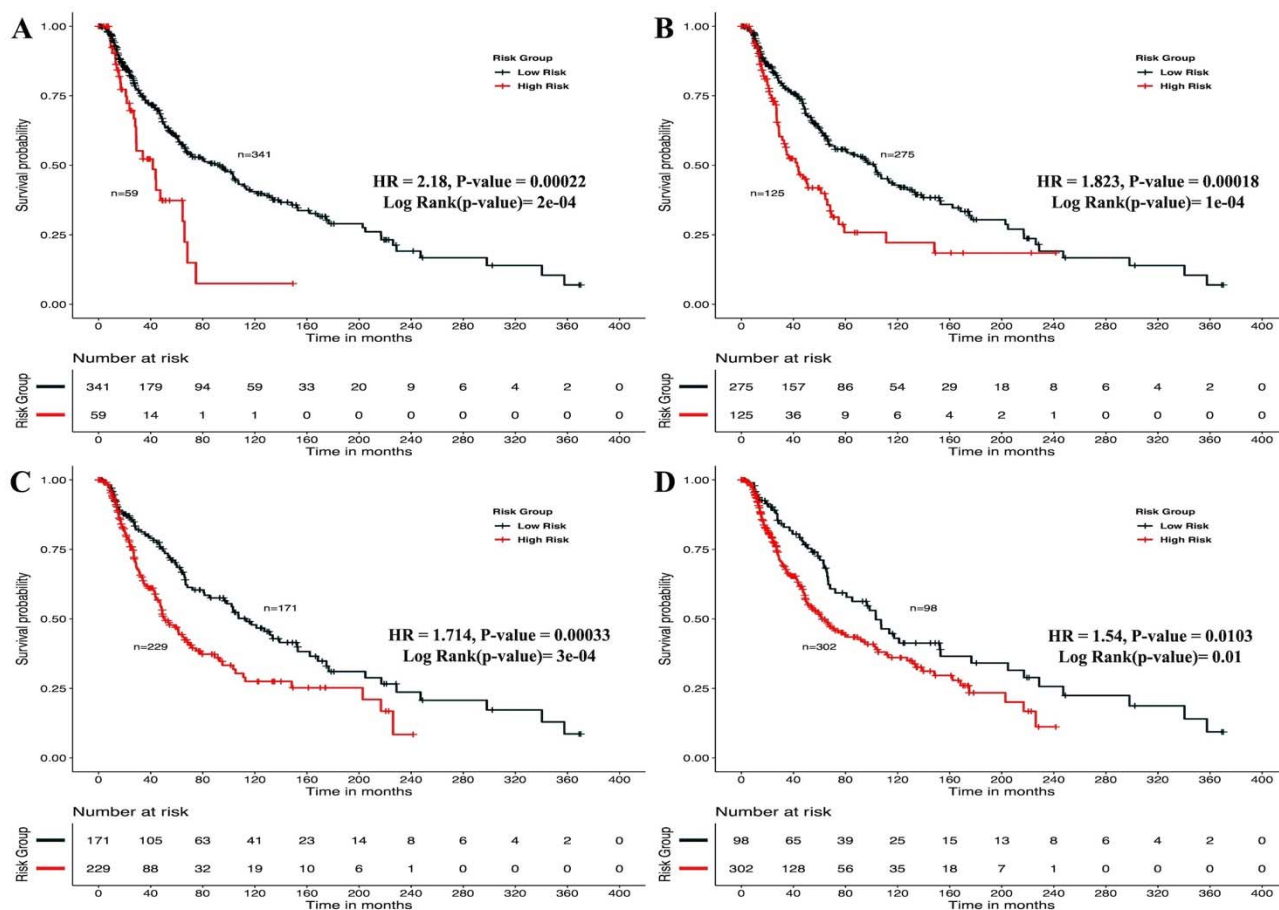

277

278 **Figure 6.** Kaplan Meier (KM) survival curves for the risk estimation of melanoma patient cohort  
 279 based on the risk score with significant p-value (A) Melanoma samples stratified on the basis of cut-  
 280 off ( $\geq 2$  Risk Score), (B) Stratified samples by taking cut-off ( $\geq 1$  Risk Score), (C) Stratified  
 281 samples by taking cut-off ( $\geq 0$  Risk Score), (D) Stratified samples by taking cut-off ( $\geq -1$  Risk  
 282 Score)

### 283 3.3.3 Clinical Characteristics

284 In the past, the clinical features like age, gender, tumor stage, tumor status and Breslow depth have  
 285 been shown a significant effect on the skin cancer incidence and bias towards a particular group (39).  
 286 For instance, even in the current study, the male incidences are higher than of females in case of  
 287 melanoma as shown in Supplementary Table S1. This prompted us to analyse the association  
 288 between these clinical features and the survival of the patients. Thus, we perform the univariate  
 289 survival analysis for the clinical features. This analysis indicates that the tumor status is one of the  
 290 major significant prognostic factors in the prediction of survival of melanoma. Here also, we used  
 291 threshold-based approach where we assign score +1 in case tumor is present in patient otherwise  
 292 zero. We predict patient high-risk if score is more than zero and obtained HR 8.293 (95% CI 4.688-  
 293 14.67) with p-value less than 0.0001 (Supplementary Table S6). Besides, age, tumor stage and  
 294 Breslow depth are other clinical features that are significantly associated with the prognosis of the  
 295 patients as shown in the KM plots shown in Figure 7. But, notably samples unable to stratified into  
 296 high-risk and low-risk significantly based on the gender as represented in Figure7.

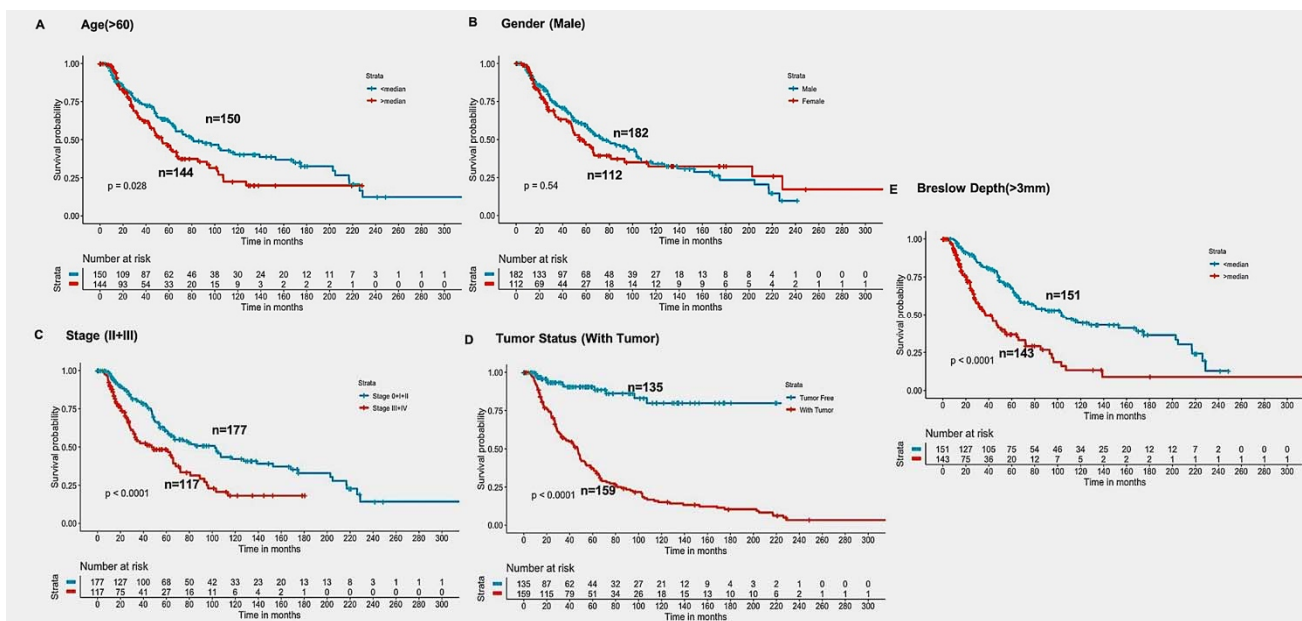

297

298 **Figure 7:** Kaplan Meier survival curves for risk estimation of SKCM cohort, show a significant  
 299 difference in the high-risk/low-risk groups. (A) Patients with age (>60 years) are stratified into  
 300 high/low risk with HR=1.45, 95% CI=1.039-2.024 and p-value=0.028, (B) Stratification of low-risk  
 301 and high-risk groups on the basis of gender with HR=1.11, 95% CI=0.7901-1.52, and p-value=0.545,  
 302 (C) Stage (III+IV) patients are on high risk as compared to Stage (0+I+II) patients with HR=1.94,  
 303 95% CI=1.386-2.722, p-value<0.001, (D) Patients with Tumor status (With Tumor) were stratified on  
 304 high/low-risk with HR=8.29, 95% CI=4.688-14.67, and p-value<0.001 (E) Patients having Breslow  
 305 depth >3mm are stratified into high/low-risk corresponding 95% CI 1.788-3.509, HR=2.5, and p-  
 306 value<0.001

### 307 3.4 Prediction Models

#### 308 3.4.1 Machine learning based prediction models

309 It is clear from the above results that both HLA-superalleles and clinical features (such as age,  
 310 gender, tumor stage, tumor status and Breslow depth) are essential for the identification of high-risk  
 311 patients. Though the threshold-based method is simple but not very efficient when we used multiple  
 312 features. Thus, to further improve the performance, we implemented a wide range of machine  
 313 learning techniques (e.g., Lasso, RF, Ridge, DT) for developing prediction models. The first model  
 314 was developed by considering all factors including clinical as well as 24 HLA-superalleles. Lasso  
 315 and RF based models obtained maximum performance with HR 3.17, p-value 3.50E-11, and HR  
 316 3.09, p-value 2.87E-11 for clinical features only, respectively, as shown in Table 3. Further, we  
 317 developed models by eliminating two factors, i.e., tumor status and tumor stage, respectively. Since  
 318 tumor stage is an important clinical factor, but this information is only available for a few patients.  
 319 So, prediction model developed without considering these clinical factors, and achieved maximum  
 320 HR=3.74 (with p-value=3.01E-14) by RF model. To further improve the performance of the machine  
 321 learning based models, we used all clinical features and 24 HLA-superalleles. This model based on  
 322 Lasso achieved maximum performance HR (4.05, 3.46, 3.51, and 3.11) with significant p-value for  
 323 all four methods. Although, RF prediction models also performed reasonably well, but have lower  
 324 HR than that of Lasso models. Complete results of the survival prediction models are represented in  
 325 Table 3.

326 **Table 3. Performance of the survival prediction models based on Clinical Characteristics and**  
 327 **24 HLA-Class I, II Superalleles implemented using various regression techniques.**

| Method                                               | Clinical Features Only |          | Clinical features + HLA-Superalleles |             |
|------------------------------------------------------|------------------------|----------|--------------------------------------|-------------|
|                                                      | HR                     | P-value  | HR                                   | P-value     |
| All Features                                         |                        |          |                                      |             |
| LASSO                                                | 3.17                   | 3.50E-11 | 4.05                                 | 4.01E-13    |
| RIDGE                                                | 3.01                   | 1.76E-10 | 3.80                                 | 2.30E-12    |
| RF                                                   | 3.09                   | 2.87E-11 | 3.77                                 | 8.15E-12    |
| DT                                                   | 2.25                   | 6.93E-07 | 2.00                                 | 5.29E-05    |
| Clinical Features without Tumor Status               |                        |          |                                      |             |
| LASSO                                                | 3.50                   | 3.93E-13 | 3.46                                 | 1.54E-11    |
| RIDGE                                                | 3.49                   | 3.93E-13 | 2.97                                 | 2.89E-09    |
| RF                                                   | 3.74                   | 3.01E-14 | 2.96                                 | 8.23E-10    |
| DT                                                   | 2.15                   | 2.24E-06 | 1.83                                 | 0.000312731 |
| Clinical Features without Tumor Stage                |                        |          |                                      |             |
| LASSO                                                | 2.80                   | 9.96E-10 | 3.51                                 | 1.32E-11    |
| RIDGE                                                | 2.43                   | 4.68E-08 | 3.55                                 | 7.56E-12    |
| RF                                                   | 2.81                   | 2.05E-10 | 3.18                                 | 2.14E-10    |
| DT                                                   | 2.50                   | 1.64E-08 | 2.76                                 | 2.38E-09    |
| Clinical Features without Tumor Stage & Tumor Status |                        |          |                                      |             |
| LASSO                                                | 2.40                   | 4.41E-08 | 3.11                                 | 5.60E-10    |
| RIDGE                                                | 2.40                   | 4.41E-08 | 2.57                                 | 5.81E-08    |
| RF                                                   | 2.99                   | 9.37E-12 | 2.59                                 | 1.55E-08    |
| DT                                                   | 2.54                   | 1.06E-08 | 2.65                                 | 7.37E-09    |

328 HR: Hazard Ratio; RF: Random Forest; DT: Decision Tree

### 329 3.4.2 Machine learning prediction models based on Wrapper method

330 It is important to have minimum number of features for avoiding over optimization and for the  
 331 practical implementation in the real life. Therefore, further wrapper method used to decrease number  
 332 of features recursively. In case of wrapper based recursive approach, one has to develop prediction  
 333 model to evaluate performance after adding/removing a feature. Here, we used recursive machine  
 334 learning method after addition of features approach. Finally, prediction models developed using five  
 335 clinical features (age, gender, tumor stage, tumor status, and Breslow depth) and various HLA-  
 336 superalleles by implementing different machine learning techniques (Table 4). Similar to above  
 337 analysis, Lasso method based on five clinical features and 14 superalleles is the top performer with  
 338 HR of 4.52 and p-value 8.01E-15 as given in Table 4. KM plot represents the stratification of high-  
 339 risk and low-risk patients based on the estimated OS using Lasso recursive regression model as  
 340 shown in Figure 8.

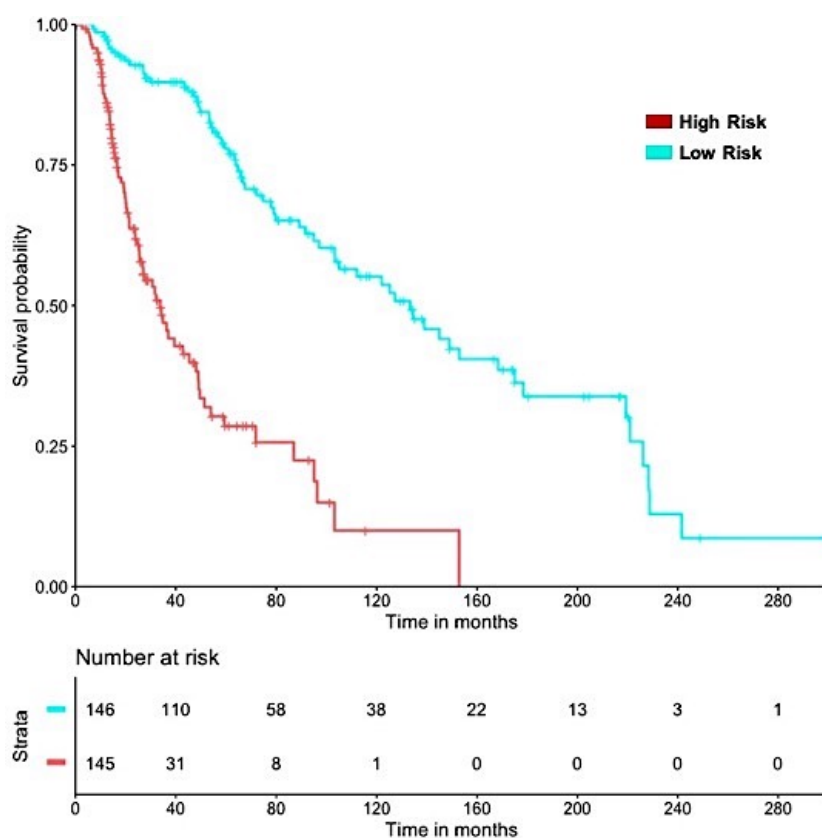

341

342 **Figure 8:** SKCM-patients were stratified based on predicted OS by using Lasso recursive regression  
 343 model after applying five-fold cross validation. Samples with predicted OS < median (predicted OS)  
 344 were at 4-fold higher risk as compared to the patients predicted OS > median (predicted OS) (HR =  
 345 4.52, 95% CI=3.088 to 6.609, p-value 8.01E-15)

346 **Table 4. Performance of the recursive prediction models based on selected features (clinical**  
 347 **features and superalleles) implemented using various regression technique**

| Method | Attribute                                                                                                                                                    | HR   | P-value  |
|--------|--------------------------------------------------------------------------------------------------------------------------------------------------------------|------|----------|
| LASSO  | Clinical + 14 HLA-Superalleles<br>(A*31_A*24_DPB1*10_B*08_DRB1*03_DRB1*07<br>_B*18_B*55_A*01_C*05_<br>DRB1*16_DRB1*12_B*49_DPB1*11)                          | 4.52 | 8.01E-15 |
| RIDGE  | Clinical + 19 HLA-Superalleles<br>(DPB1*10_B*50_C*07_B*49_B*55_B*08_C*01_C<br>*14_DPB1*06_C*05_DRB1*03_A*30_DRB1*07_<br>A*31_B*14_DRB1*16_B*13_DPB1*01_A*01) | 3.85 | 3.35E-12 |
| RF     |                                                                                                                                                              | 3.53 | 2.84E-11 |

|                                                      |                                              |      |          |
|------------------------------------------------------|----------------------------------------------|------|----------|
| Clinical + 3 HLA-Superalleles<br>(DPB1*11_C*05_B*08) |                                              |      |          |
| DT                                                   | Clinical + 2 HLA-Superalleles (A*01_DPB1*01) | 2.59 | 6.92E-08 |

348 HR: Hazard Ratio; RF: Random Forest; DT: Decision Tree; Attribute: Clinical features and selected  
349 HLA-superalleles

### 350 3.5 Multivariate Survival analysis for SF and SU HLA-superalleles

351 Further, to understand the combined effect of the multiple variables like SF and SU HLA-  
352 superalleles, Risk Score and clinical features on the survival of the patients, we perform multivariate  
353 survival analysis using Cox proportional hazard model (40). This analysis reveals that “Risk Score”  
354 is one of the most significant factors associated with the survival of patients. Results shown in  
355 Supplementary Figure S2, indicate that the presence of SU superalleles reduces the survival of  
356 melanoma samples. SU patients’ group is at approximately two times higher risk as compared to the  
357 SF patients’ group is indicated by HR = 2.44 (95% CI 1.68 to 3.5) with a p-value less than 3.02E-06,  
358 shown in Table 5. Both multivariate and univariate analysis reveals that age (>60), stage (III and IV),  
359 Breslow depth (>3mm) and Risk Score (>0) are associated with the poor survival in melanoma  
360 patients.

361 **Table 5: Comparison of Univariate and Multivariate Analysis**

| Covariate                | Univariate Survival Analysis |              |         | Multivariate Survival Analysis |          |          |
|--------------------------|------------------------------|--------------|---------|--------------------------------|----------|----------|
|                          | HR                           | 95% CI       | P-value | HR                             | 95% CI   | P-value  |
| Age (>60years)           | 1.45                         | 1.039-2.024  | 0.029   | 1.45                           | 1.03-2.0 | 0.032    |
| Gender(Female)           | 1.11                         | 0.790-1.520  | 0.545   | 0.98                           | 0.69-1.4 | 0.896    |
| Tumor Stage(III+IV)      | 1.94                         | 1.386-2.722  | 0.001   | 1.89                           | 1.33-2.7 | 0.0004   |
| Tumor Status(With Tumor) | 8.29                         | 4.688-14.670 | <0.001  | 9.24                           | 5.21-2.8 | 2.76E-14 |
| Breslow Depth(>3mm)      | 2.50                         | 1.788-3.509  | <0.001  | 1.96                           | 1.38-2.8 | 0.00017  |
| Risk Score(>0)           | 1.82                         | 1.331-2.496  | <0.001  | 2.44                           | 1.68-3.5 | 3.02E-06 |

362 HR: Hazard Ratio, 95% CI: 95% Confidence Interval

363 Further, to scrutinize which specific superalleles out of SF and SU superalleles groups, are  
364 significantly associated with good and poor outcome of the patients, multivariate analysis was  
365 performed using each of SF and SU superalleles with the clinical characteristics. Results from this  
366 analysis is shown that the presence of HLA-B\*55 and HLA-A\*01 superalleles is significantly  
367 associated with good outcome; while, HLA-DRB1\*12, HLA-B\*50, HLA-B\*13, HLA-DPB1\*06,  
368 HLA-A\*31, HLA-A\*24 are significantly associated with poor outcome of melanoma cohort in terms  
369 of their survival time as given in Supplementary (Table S7, S8 and Figure S3, S4).

### 370 3.6 Web Server for risk prediction in SKCM patients: SKCMhrp

371 To serve the scientific community, we developed a web server, “SKCMhrp”  
372 <https://webs.iiitd.edu.in/raghava/skcmhrp/>. SKCMhrp is designed for the risk prediction using



373 clinical features and HLA-superalleles. It has two modules; one is based on clinical features and  
374 second is based on superalleles. First module predicts risk status of melanoma patients based on their  
375 clinical characteristics, *i.e.* age, gender, tumor stage, tumor status, Breslow depth. Here, an user can  
376 predict the survival time (in months) of the individual sample, even by choosing a single clinical  
377 feature. Input values are given to a regression model to estimate the Risk Status (RS). Second  
378 module predicts the risk status of melanoma patients using all 19 features that include five clinical  
379 characteristics and 14 superalleles.

#### 380 **4 Discussion**

381 The American Cancer Society estimated 96,480 new melanoma cases (57,220 in men and 39,260 in  
382 women) in 2019, out of which around 7,230 people are expected to die (41). FDA has approved  
383 several therapies and strategies to curb melanoma over the past few years. Choosing a treatment from  
384 the available options requires information about the tumor such as its location, stage, *etc.* The major  
385 therapeutic options that exist are chemotherapy, radiotherapy, immunotherapy, photodynamic  
386 therapy, targeted therapy and surgical resection (42–44). Recent findings suggested that there is a  
387 relationship between the inadequate response of the immune system and the proliferation of  
388 melanoma cells (45). Antigenic repertoire variability is one of the crucial factors for the tumor  
389 progression and immunosurveillance (46). Due to the inadequate antigen processing mechanisms  
390 such as heterogeneous expression of HLA genes and defective immune system, it unable the CD8+  
391 T-cells to recognize melanoma cells (47). HLA-Class I and II proteins are the key components of the  
392 immune system and have a significant role in the progression of melanoma(48,49). Gogas H et al.,  
393 indicate that HLA-Cw\*06-positive melanoma patients have better OS as compared to HLA-Cw\*06-  
394 negative samples(50). Recent findings suggest that the higher expression of HLA-Class II genes  
395 enhances the survival of melanoma patients (51). This points out that the presence of HLA-Class II  
396 alleles also affects the survival of patients. Thus, it is important to understand which specific HLA-  
397 alleles from Class-I and Class-II could affect the survival of the patients. Eventually, how the HLA-  
398 genotypes of patients can improve the melanoma detection and therapeutic options for their better  
399 clinical outcome. The current study is a systematic attempt to understand the prognostic role of  
400 Class-I and Class-II alleles in the survival of melanoma patients. Towards this, firstly 367 HLA-  
401 genotypes identified for 415 skin cutaneous melanoma patients. These 367 alleles have lower  
402 frequency distribution among patients as shown in Table S1. Thus, it is difficult to delineate any  
403 reliable conclusion regarding any of the alleles from the analysis. This propels us for their assignment  
404 to 121 HLA-superalleles, based on the similarity of HLA-genes and Field1 (F1). Further, these  
405 superalleles are categorized into SF and SU groups based on the impact of their presence on the  
406 survival of the patients, *i.e.* higher MOS or lower MOS of the patients with their occurrence,  
407 respectively. Here, among the 24 superalleles, nine were SF include HLA-B\*55, HLA-DPB1\*01,  
408 HLA-DPB1\*10, HLA-B\*08, HLA-B\*49, HLA-A\*01, HLA-DRB1\*03, HLA-C\*05, HLA-C\*07;  
409 while, 15 were SU that include HLA-B\*14, HLA-A\*24, HLA-DPB1\*05, HLA-A\*31, HLA-  
410 DPB1\*11, HLA-DRB1\*07, HLA-DPB1\*06, HLA-C\*14, HLA-B\*18, HLA-C\*01, HLA-B\*13,  
411 HLA-A\*30, HLA-DRB1\*16, HLA-B\*50, HLA-DRB1\*12. Further, in the current study, Risk score  
412 is computed to evaluate the cumulative effect of the presence of SF and SU superalleles in patients.  
413 Thereafter, important HLA-superalleles, Risk score and clinical features like tumor status, age, and  
414 stage, were identified that can significantly stratified high-risk and low-risk survival groups  
415 employing univariate survival analysis and log rank test (Supplementary Table S3). Among them,  
416 particularly, HLA-B\*50:01 (HR=2.77, p-value=0.01), HLA-DRB1\*12:01 (HR=2.51, p-value=0.01),  
417 HLA-DPB1\*05:02 (HR=2.39, p-value=0.01), HLA-C\*15:02 (HR=1.91, p-value=0.05), HLA-  
418 B\*35:01(HR=1.52, p-value=0.06) significantly reduces the OS.

419 In the current study, multivariate analysis reveals SF and SU HLA-superalleles as the independent  
420 prognostic indicators. For instance, the presence of HLA-Class I superalleles include HLA-B\*55  
421 (HR=0.15, p-value=0.013) and HLA-A\*01(HR=0.54, p-value=0.011)) are significantly associated  
422 with good outcome (Supplementary Table S7, Figure S4). On the other hand, superalleles such as  
423 HLA-B\*50 (HR=3.35, p-value=0.02), HLA-DRB1\*12 (HR=3.44, p-value=0.028), HLA-DRB1\*16  
424 (HR=2.18, p-value=0.04), HLA-B\*13 (HR=2.49, p-value=0.04), HLA-DPB1\*06 (HR=3.15, p-  
425 value=0.006), HLA-A\*31 (HR=2.09, p-value=0.01) and, HLA-A\*24 (HR=1.76, p-value=0.006)  
426 associated with the poor survival outcome in SKCM-cohort (Supplementary Table S8, Figure S5).  
427 Eventually, the multivariate analysis revealed the Risk score, tumor status, tumor stage, Breslow  
428 depth and age as major independent prognostic factors for melanoma patients. Besides, the low  
429 expression (with mean cut-off) of HLA (-A, -B, -C, -DPB1, -DQB1, -DRB1) genes, consequently  
430 decreases the OS rate of melanoma cohort shown in Supplementary Table S9. Furthermore, various  
431 prediction models developed for the estimation of survival time of patients based on clinical  
432 characteristics, HLA-superalleles genotypes, and their various combinations implementing different  
433 machine learning techniques, *i.e.* Lasso, Random forest, DT and Ridge regression models.  
434 Subsequently, the predicted OS from these machine learning algorithms further employed for the  
435 stratification of high-risk and low-risk survival groups. Although, the prediction based on five  
436 clinical factors attained consistent performance, *i.e.* HR=3.17; but, stage and tumor status are two  
437 important factors which are mostly not available as their determination is a difficult task. Therefore,  
438 we have also developed prediction models after exclusion of these two factors. The performance of  
439 our ML models substantially decreased to HR 2.40. Further, prediction models developed employing  
440 important clinical factors with HLA-superalleles and removing tumor stage and tumor status as well.  
441 Results indicate that the performance of models based on HLA-superalleles and conveniently  
442 available clinical factors like age, gender and Breslow depth considerably improved from HR (2.40  
443 to 3.11). Lasso and RF recursive regression models are among the top performers to predict survival  
444 of melanoma samples. Particularly, predicted OS obtained from Lasso recursive model, based on  
445 clinical characteristics and nine-superalleles significantly (p-value<0.001) stratified the high-risk and  
446 low-risk survival groups of the melanoma patients with HR=4.52. Although, RF-based models  
447 performed reasonably well in the estimation of OS, but, stratified survival risk groups with lower  
448 performance than that of Lasso models, *i.e.* HR=3.53 only.

## 449 **5 Conclusion**

450 Taken together, our findings exhibit that the occurrence of HLA-Class I, II alleles genotype influence  
451 the overall survival of SKCM patients both in favourable and unfavourable directions. Eventually,  
452 survival analysis and recursive machine learning regression models revealed the prognostic potential  
453 of important 14 superalleles and five clinical factors in the stratification of high-risk and low-risk  
454 survival groups and the estimation of overall survival time, respectively. Further, these HLA-based  
455 signatures could be considered to design personalized vaccine in several clinical cohorts. For the  
456 clinical utility, this further needs to confirm by exploring the role of these superalleles in other  
457 cohorts. Finally, to provide service to scientific community for prediction of high-risk patients based  
458 on their clinical features and 14 HLA-superalleles, we designated webserver “SKCMhrp”.

## 459 **6 Conflict of Interest**

460 The authors declare no competing financial and non-financial interests.

## 461 **7 Author Contributions**

462 AD, HK, SB, collected the data and processed the datasets. AD, HK, SP, implement the algorithm.  
463 AD, SP, created the back-end server and front-end user interface. AD, SP, developed prediction  
464 models. AD, HK and GPSR analysed the results. AD, HK, SP, CA, and GPSR penned the  
465 manuscript. GPSR conceived and coordinated the project, facilitated in the interpretation and data  
466 analysis and gave overall supervision to the project. All authors have read and approved the final  
467 manuscript.

## 468 **8 Funding**

469 This research was funded by J. C. Bose National Fellowship (with Grant No. SRP076), Department  
470 of Science and Technology (DST), INDIA.

## 471 **9 Data Availability Statement**

472 All the datasets generated for this study are either included in this article/Supplementary material or  
473 available at the “SKCMhrp” webserver <https://webs.iiitd.edu.in/raghava/skcmhrp/data.php>, as  
474 mentioned in the Materials and Methods section.

## 475 **10 Acknowledgements**

476 All the authors acknowledge funding agencies J. C. Bose National Fellowship (DST). AD, SP, HK,  
477 and SB, are thankful to DST INSPIRE, DBT, CSIR and ICMR for providing fellowships,  
478 respectively.

## 479 **11 Supplementary Material**

480 The supplementary material for this article can be found at.....

## 481 **12 Reference**

- 482 1. Beck S, Trowsdale J. The human major histocompatibility complex: lessons from the DNA  
483 sequence. *Annu Rev Genomics Hum Genet* (2000) **1**:117–37.  
484 doi:10.1146/annurev.genom.1.1.117
- 485 2. Choo SY. The HLA system: genetics, immunology, clinical testing, and clinical implications.  
486 *Yonsei Med J* (2007) **48**:11–23. doi:10.3349/ymj.2007.48.1.11
- 487 3. Bonamigo RR, de Carvalho AVE, Sebastiani VRZ, da Silva CM, Pinto AC de Z. HLA e  
488 câncer de pele. *An Bras Dermatol* (2012) **87**:9–18. doi:10.1590/S0365-05962012000100001
- 489 4. Watts C. The exogenous pathway for antigen presentation on major histocompatibility  
490 complex class II and CD1 molecules. *Nat Immunol* (2004) **5**:685–92. doi:10.1038/ni1088
- 491 5. Traherne JA. Human MHC architecture and evolution: Implications for disease association  
492 studies. *Int J Immunogenet* (2008) **35**:179–192. doi:10.1111/j.1744-313X.2008.00765.x
- 493 6. Sabapathy K, Nam SY. Defective MHC class I antigen surface expression promotes cellular  
494 survival through elevated ER stress and modulation of p53 function. *Cell Death Differ* (2008)  
495 **15**:1364–1374. doi:10.1038/cdd.2008.55
- 496 7. Aptsiauri N, Cabrera T, Mendez R, Garcia-Lora A, Ruiz-Cabello F, Garrido F. Role of altered  
497 expression of HLA class I molecules in cancer progression. *Adv Exp Med Biol* (2007)

- 498 **601**:123–31. doi:10.1007/978-0-387-72005-0\_13
- 499 8. Mendez R, Aptsiauri N, Del Campo A, Maleno I, Cabrera T, Ruiz-Cabello F, Garrido F,  
500 Garcia-Lora A. HLA and melanoma: Multiple alterations in HLA class I and II expression in  
501 human melanoma cell lines from ESTDAB cell bank. *Cancer Immunol Immunother* (2009)  
502 **58**:1507–1515. doi:10.1007/s00262-009-0701-z
- 503 9. Johansen LL, Lock-Andersen J, Hviid TVF. The Pathophysiological Impact of HLA Class Ia  
504 and HLA-G Expression and Regulatory T Cells in Malignant Melanoma: A Review. *J*  
505 *Immunol Res* (2016) **2016**: doi:10.1155/2016/6829283
- 506 10. Garrido F, Cabrera T, Aptsiauri N. “Hard” and “soft” lesions underlying the HLA class I  
507 alterations in cancer cells: Implications for immunotherapy. *Int J Cancer* (2010) **127**:249–256.  
508 doi:10.1002/ijc.25270
- 509 11. Bhalla S, Kaur H, Dhall A, Raghava GPS. Prediction and Analysis of Skin Cancer Progression  
510 using Genomics Profiles of Patients. *Sci Rep* (2019) **9**:15790. doi:10.1038/s41598-019-52134-  
511 4
- 512 12. Li Y, Krahn JM, Flake GP, Umbach DM, Li L. Toward predicting metastatic progression of  
513 melanoma based on gene expression data. *Pigment Cell Melanoma Res* (2015) **28**:453–463.  
514 doi:10.1111/pcmr.12374
- 515 13. Ossio R, Roldán-Marín R, Martínez-Said H, Adams DJ, Robles-Espinoza CD. Melanoma: A  
516 global perspective. *Nat Rev Cancer* (2017) **17**:393–394. doi:10.1038/nrc.2017.43
- 517 14. Büttner P, Garbe C, Bertz J, Burg G, d’Hoedt B, Drepper H, Guggenmoos-Holzmann I,  
518 Lechner W, Lippold A, Orfanos CE. Primary cutaneous melanoma. Optimized cutoff points of  
519 tumor thickness and importance of Clark’s level for prognostic classification. *Cancer* (1995)  
520 **75**:2499–2506. doi:10.1002/1097-0142(19950515)75:10<2499::aid-  
521 cncr2820751016>3.0.co;2-8
- 522 15. Bristow IR, de Berker DA, Acland KM, Turner RJ, Bowling J. Clinical guidelines for the  
523 recognition of melanoma of the foot and nail unit. *J Foot Ankle Res* (2010) **3**:  
524 doi:10.1186/1757-1146-3-25
- 525 16. Khair DO, Bax HJ, Mele S, Crescioli S, Pellizzari G, Khiabany A, Nakamura M, Harris RJ,  
526 French E, Hoffmann RM, et al. Combining immune checkpoint inhibitors: Established and  
527 emerging targets and strategies to improve outcomes in melanoma. *Front Immunol* (2019) **10**:  
528 doi:10.3389/fimmu.2019.00453
- 529 17. Nestle FO, Burg G, Föh J, Wrone-Smith T, Nickoloff BJ. Human sunlight-induced basal-cell-  
530 carcinoma-associated dendritic cells are deficient in T cell co-stimulatory molecules and are  
531 impaired as antigen-presenting cells. *Am J Pathol* (1997) **150**:641–51. Available at:  
532 <http://www.ncbi.nlm.nih.gov/pubmed/9033277> [Accessed September 27, 2019]
- 533 18. Sun W, Schuchter LM. Metastatic melanoma. *Curr Treat Options Oncol* (2001) **2**:193–202.  
534 Available at: <http://www.ncbi.nlm.nih.gov/pubmed/12057119> [Accessed September 27, 2019]
- 535 19. Cabrera T, Lara E, Romero JM, Maleno I, Real LM, Ruiz-Cabello F, Valero P, Camacho FM,  
536 Garrido F. HLA class I expression in metastatic melanoma correlates with tumor development  
537 during autologous vaccination. *Cancer Immunol Immunother* (2007) **56**:709–17.  
538 doi:10.1007/s00262-006-0226-7
- 539 20. Carretero R, Romero JM, Ruiz-Cabello F, Maleno I, Rodriguez F, Camacho FM, Real LM,  
540 Garrido F, Cabrera T. Analysis of HLA class I expression in progressing and regressing  
541 metastatic melanoma lesions after immunotherapy. *Immunogenetics* (2008) **60**:439–47.

- 542 doi:10.1007/s00251-008-0303-5
- 543 21. Campillo JA, Martínez-Escribano JA, Muro M, Moya-Quiles R, Marín LA, Montes-Ares O,  
544 Guerra N, Sánchez-Pedreño P, Frías JF, Lozano JA, et al. HLA class I and class II frequencies  
545 in patients with cutaneous malignant melanoma from southeastern Spain: the role of HLA-C in  
546 disease prognosis. *Immunogenetics* (2006) **57**:926–33. doi:10.1007/s00251-005-0065-2
- 547 22. Chowell D, Morris LGT, Grigg CM, Weber JK, Samstein RM, Makarov V, Kuo F, Kendall  
548 SM, Requena D, Riaz N, et al. Patient HLA class I genotype influences cancer response to  
549 checkpoint blockade immunotherapy. *Science* (80- ) (2018) **359**:582–587.  
550 doi:10.1126/science.aao4572
- 551 23. Gogas H, Kirkwood JM, Falk CS, Dafni U, Sondak VK, Tsoutsos D, Stratigos A,  
552 Markopoulos C, Pectasides D, Spyropoulou-Vlachou M. Correlation of molecular human  
553 leukocyte antigen typing and outcome in high-risk melanoma patients receiving adjuvant  
554 interferon. *Cancer* (2010) **116**:4326–4333. doi:10.1002/cncr.25211
- 555 24. Grossman RL, Heath AP, Ferretti V, Varmus HE, Lowy DR, Kibbe WA, Staudt LM. Toward  
556 a shared vision for cancer genomic data. *N Engl J Med* (2016) **375**:1109–1112.  
557 doi:10.1056/NEJMp1607591
- 558 25. Liu J, Lichtenberg T, Hoadley KA, Poisson LM, Lazar AJ, Cherniack AD, Kovatich AJ, Benz  
559 CC, Levine DA, Lee A V., et al. An Integrated TCGA Pan-Cancer Clinical Data Resource to  
560 Drive High-Quality Survival Outcome Analytics. *Cell* (2018) **173**:400–416.e11.  
561 doi:10.1016/j.cell.2018.02.052
- 562 26. Zhu Y, Qiu P, Ji Y. TCGA-assembler: Open-source software for retrieving and processing  
563 TCGA data. *Nat Methods* (2014) **11**:599–600. doi:10.1038/nmeth.2956
- 564 27. Li H, Handsaker B, Wysoker A, Fennell T, Ruan J, Homer N, Marth G, Abecasis G, Durbin R.  
565 The Sequence Alignment/Map format and SAMtools. *Bioinformatics* (2009) **25**:2078–2079.  
566 doi:10.1093/bioinformatics/btp352
- 567 28. Robinson J, Soormally AR, Hayhurst JD, Marsh SGE. The IPD-IMGT/HLA Database - New  
568 developments in reporting HLA variation. *Hum Immunol* (2016) **77**:233–237.  
569 doi:10.1016/j.humimm.2016.01.020
- 570 29. Kishore J, Goel M, Khanna P. Understanding survival analysis: Kaplan-Meier estimate. *Int J*  
571 *Ayurveda Res* (2010) **1**:274. doi:10.4103/0974-7788.76794
- 572 30. Geurts P, Ernst D, Wehenkel L. Extremely randomized trees. *Mach Learn* (2006) **63**:3–42.  
573 doi:10.1007/s10994-006-6226-1
- 574 31. Friedman J, Hastie T, Tibshirani R. Regularization Paths for Generalized Linear Models via  
575 Coordinate Descent. *J Stat Softw* (2010) **33**:1–22. Available at:  
576 <http://www.ncbi.nlm.nih.gov/pubmed/20808728> [Accessed September 27, 2019]
- 577 32. Chapter 11 Classification Algorithms and Regression Trees.
- 578 33. Pedregosa FABIANPEDREGOSA F, Michel V, Grisel OLIVIERGRISEL O, Blondel M,  
579 Prettenhofer P, Weiss R, Vanderplas J, Cournapeau D, Pedregosa F, Varoquaux G, et al.  
580 Scikit-learn: Machine Learning in Python Gaël Varoquaux Bertrand Thirion Vincent Dubourg  
581 Alexandre Passos PEDREGOSA, VAROQUAUX, GRAMFORT ET AL. Matthieu Perrot.  
582 (2011). Available at: <http://scikit-learn.sourceforge.net>. [Accessed September 27, 2019]
- 583 34. Patiyal S, Agrawal P, Kumar V, Dhall A, Kumar R, Mishra G, Raghava GPS. NAGbinder: An  
584 approach for identifying N-acetylglucosamine interacting residues of a protein from its  
585 primary sequence. *Protein Sci* (2019) doi:10.1002/pro.3761

- 586 35. Schemper M. The relative importance of prognostic factors in studies of survival. *Stat Med*  
587 (1993) **12**:2377–82. doi:10.1002/sim.4780122413
- 588 36. Chen H-C, Kodell RL, Cheng KF, Chen JJ. Assessment of performance of survival prediction  
589 models for cancer prognosis. *BMC Med Res Methodol* (2012) **12**:102. doi:10.1186/1471-2288-  
590 12-102
- 591 37. Xie C, Yeo ZX, Wong M, Piper J, Long T, Kirkness EF, Biggs WH, Bloom K, Spellman S,  
592 Vierra-Green C, et al. Fast and accurate HLA typing from short-read next-generation sequence  
593 data with xHLA. *Proc Natl Acad Sci U S A* (2017) **114**:8059–8064.  
594 doi:10.1073/pnas.1707945114
- 595 38. Williams TM. Human leukocyte antigen gene polymorphism and the histocompatibility  
596 laboratory. *J Mol Diagn* (2001) **3**:98–104. doi:10.1016/S1525-1578(10)60658-7
- 597 39. Zhang M, Zhang N. Clinical and prognostic factors in 98 patients with malignant melanoma in  
598 China. *J Int Med Res* (2017) **45**:1369–1377. doi:10.1177/0300060517708922
- 599 40. Bradburn MJ, Clark TG, Love SB, Altman DG. Survival Analysis Part II: Multivariate data  
600 analysis- An introduction to concepts and methods. *Br J Cancer* (2003) **89**:431–436.  
601 doi:10.1038/sj.bjc.6601119
- 602 41. American Cancer Society | Information and Resources about for Cancer: Breast, Colon, Lung,  
603 Prostate, Skin. Available at: [https://www.cancer.org/content/dam/cancer-org/research/cancer-  
604 facts-and-statistics/annual-cancer-facts-and-figures/2019/](https://www.cancer.org/content/dam/cancer-org/research/cancer-facts-and-statistics/annual-cancer-facts-and-figures/2019/) [Accessed September 27, 2019]
- 605 42. Batus M, Waheed S, Ruby C, Petersen L, Bines SD, Kaufman HL. Optimal management of  
606 metastatic melanoma: Current strategies and future directions. *Am J Clin Dermatol* (2013)  
607 **14**:179–194. doi:10.1007/s40257-013-0025-9
- 608 43. Miller KD, Siegel RL, Lin CC, Mariotto AB, Kramer JL, Rowland JH, Stein KD, Alteri R,  
609 Jemal A. Cancer treatment and survivorship statistics, 2016. *CA Cancer J Clin* (2016) **66**:271–  
610 289. doi:10.3322/caac.21349
- 611 44. van Zeijl MCT, van den Eertwegh AJ, Haanen JB, Wouters MWJM. (Neo)adjuvant systemic  
612 therapy for melanoma. *Eur J Surg Oncol* (2017) **43**:534–543. doi:10.1016/j.ejso.2016.07.001
- 613 45. Palmieri G, Ombra MN, Colombino M, Casula M, Sini MC, Manca A, Paliogiannis P,  
614 Ascierto PA, Cossu A. Multiple molecular pathways in melanomagenesis: Characterization of  
615 therapeutic targets. *Front Oncol* (2015) **5**: doi:10.3389/fonc.2015.00183
- 616 46. Dunn GP, Old LJ, Schreiber RD. The immunobiology of cancer immunosurveillance and  
617 immunoediting. *Immunity* (2004) **21**:137–148. doi:10.1016/j.immuni.2004.07.017
- 618 47. Cormier JN, Hijazi YM, Abati A, Fetsch P, Bettinotti M, Steinberg SM, Rosenberg SA,  
619 Marincola FM. Heterogeneous expression of melanoma-associated antigens and HLA-A2 in  
620 metastatic melanoma in vivo. *Int J Cancer* (1998) **75**:517–524. doi:10.1002/(SICI)1097-  
621 0215(19980209)75:4<517::AID-IJC5>3.0.CO;2-W
- 622 48. Bonamigo RR, Carvalho AVE de, Sebastiani VRZ, Silva CM da, Pinto AC de Z. HLA and  
623 skin cancer. *An Bras Dermatol* **87**:9–16; quiz 17–8. doi:10.1590/s0365-05962012000100001
- 624 49. Kandilarova SM, Paschen A, Mihaylova A, Ivanova M, Schadendorf D, Naumova E. The  
625 Influence of HLA and KIR Genes on Malignant Melanoma Development and Progression.  
626 *Arch Immunol Ther Exp (Warsz)* (2016) **64**:73–81. doi:10.1007/s00005-016-0437-3
- 627 50. Gogas H, Kirkwood JM, Falk CS, Dafni U, Sondak VK, Tsoutsos D, Stratigos A,  
628 Markopoulos C, Pectasides D, Spyropoulou-Vlachou M. Correlation of molecular human

- 629 leukocyte antigen typing and outcome in high-risk melanoma patients receiving adjuvant  
630 interferon. *Cancer* (2010) **116**:4326–33. doi:10.1002/cncr.25211
- 631 51. Chen Y-Y, Chang W-A, Lin E-S, Chen Y-J, Kuo P-L. Expressions of HLA Class II Genes in  
632 Cutaneous Melanoma Were Associated with Clinical Outcome: Bioinformatics Approaches  
633 and Systematic Analysis of Public Microarray and RNA-Seq Datasets. *Diagnostics* (2019)  
634 **9**:59. doi:10.3390/diagnostics9020059
- 635
